# Supplementary material for: Fully Non-conjugated Phosphorylated Chitosan Enhances Hole Injection for Efficient Perovskite Light-Emitting Diodes
Source: Research Square preprint supplement (doi:10.21203/rs.3.rs-8217294/v1), 2025-11-28
Supplement: Supplementary file 1 [file 66039341f93d36e00d7cb170.docx]

**Fully** **Non-conjugated Phosphorylated Chitosan Enhances Hole Injection for Efficient Perovskite Light-Emitting Diodes**

Hao Yao 1,2,#, Enbo Zhou1,2,#, Xingye Zhang3, Xinhua Ouyang1,2,*

*1 Laboratory for Green Photoelectronic Devices and Energy Storage Batteries, Fujian Agriculture&Foresty University, Fuzhou, 350108, PR China*

*2 College of Material Engineering, Fujian Agriculture and Forestry University, Fuzhou, 350108, P. R. China*

*3 South China University of Technology Advanced Institute of Aggregation-Induced Light Emission, Guangzhou 510530, PR China*

*Email:* [*ouyangxh@fafu.edu.cn*](mailto:ouyangxh@fafu.edu.cn) *(X. O.)*


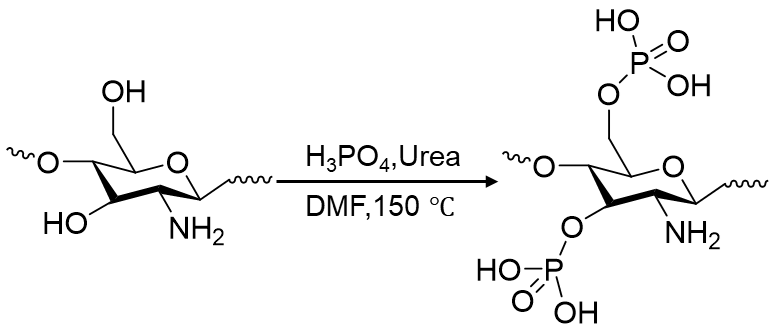


**Supplementary Figure. 1** Illustration of synthetic routes to NCPC.

**
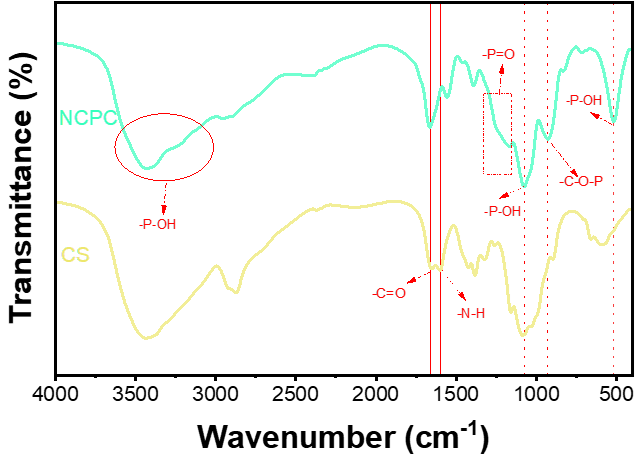
**

**Supplementary Figure. 2** FTIR spectra of NCPC and CS.

**
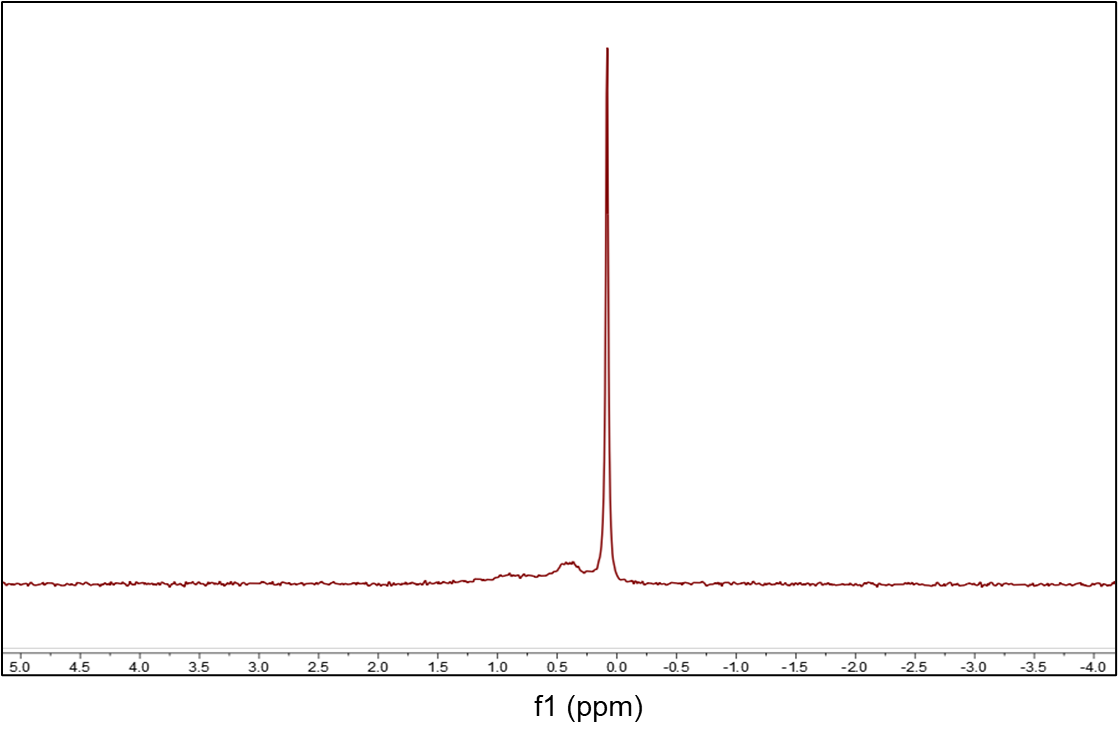
**

**Supplementary Figure. 3** 31P NMR spectra of NCPC in D2O.

**
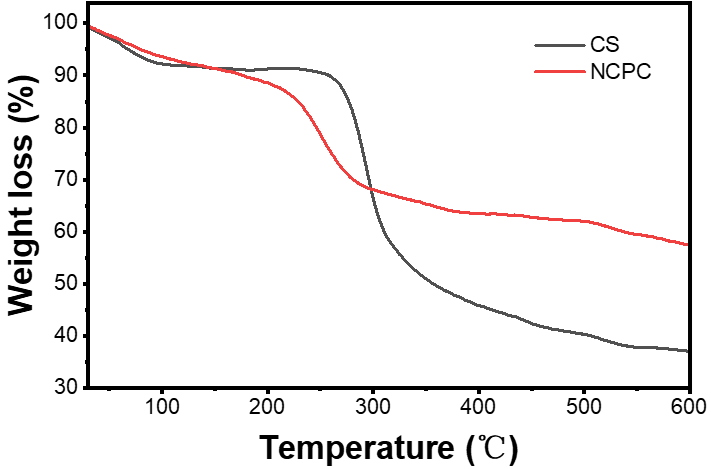
**

**Supplementary Figure. 4** The TGA curve of NCPC and CS.

**
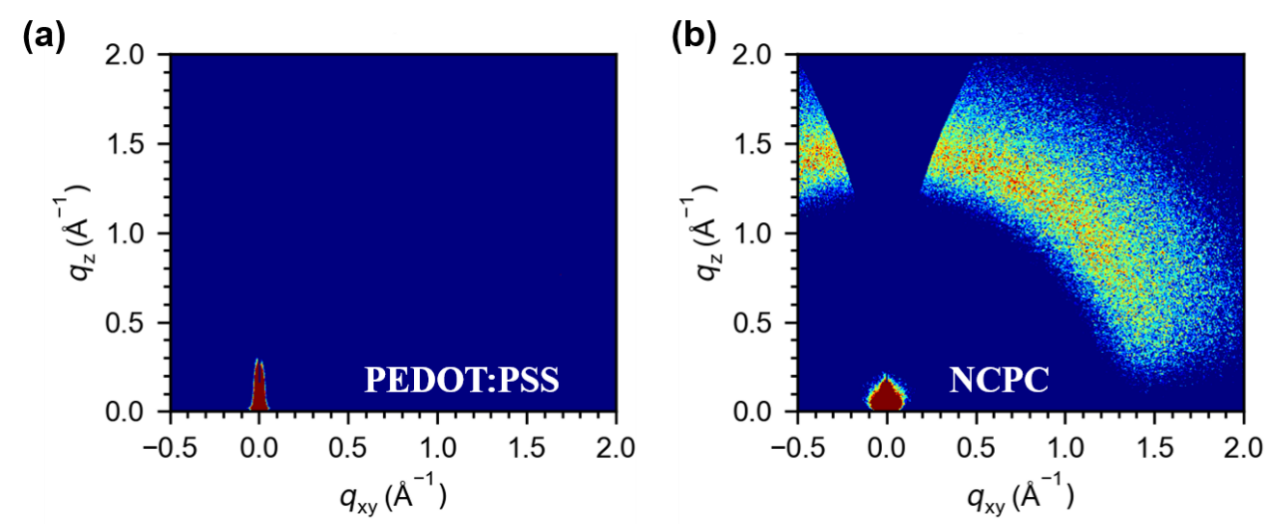
**

**Supplementary Figure. 5** 2D GIWAXS images of **(a)** PEDOT:PSS and **(b)** NCPC.

**
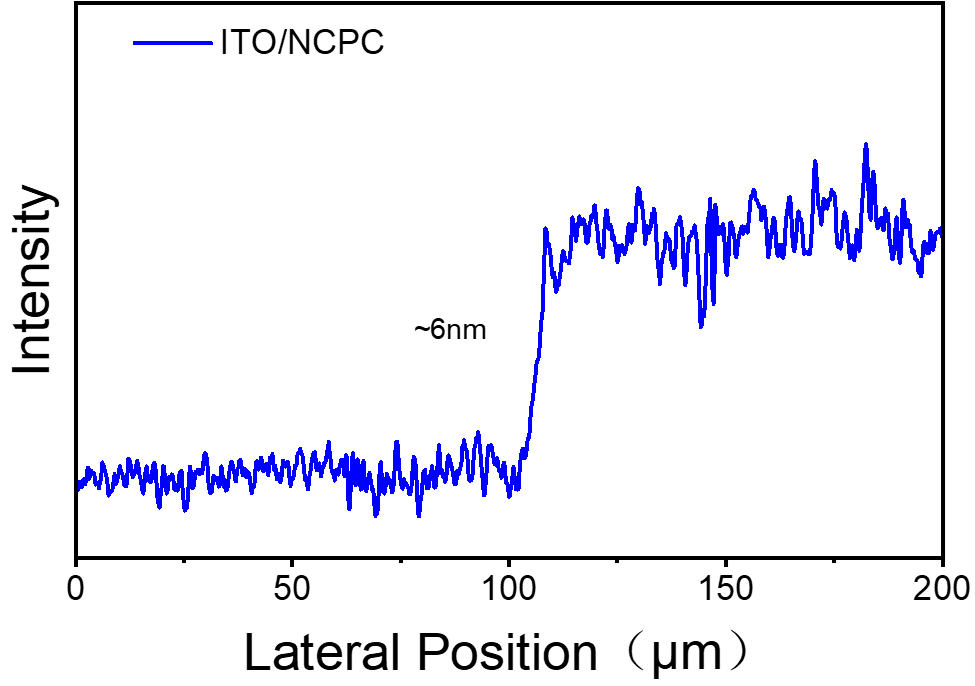
**

**Supplementary Figure. 6** Film thickness of NCPC film.

**
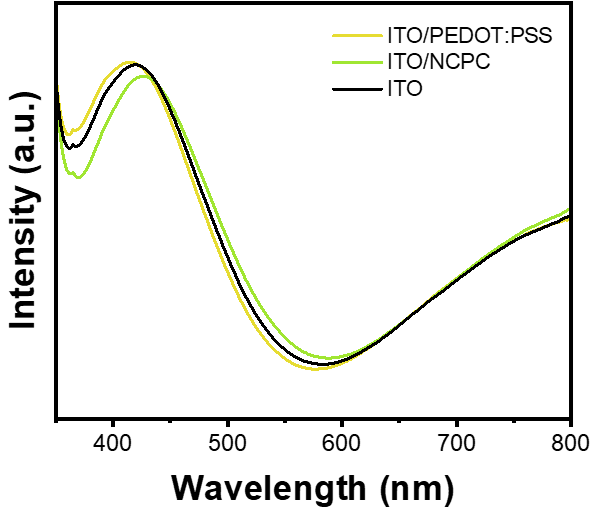
**

**Supplementary Figure. 7** UV–vis absorption spectra of ITO、ITO/PEDOT:PSS and ITO/NCPC.

**
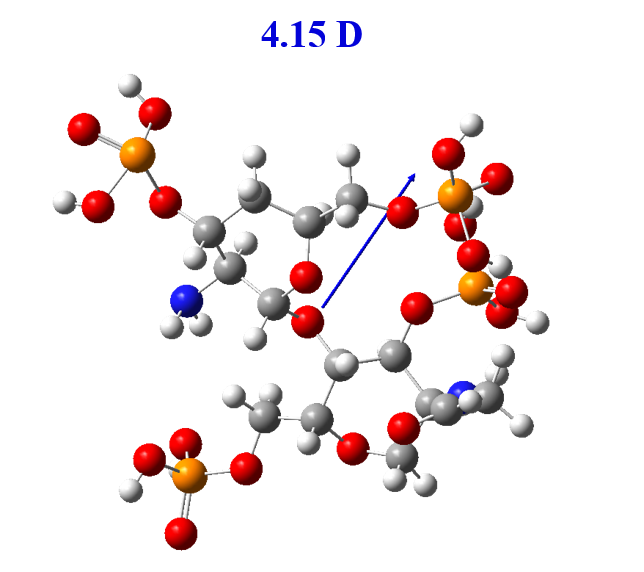
**

**Supplementary Figure. 8** The optimized geometric molecular configuration and dipole moments of NCPC.

**
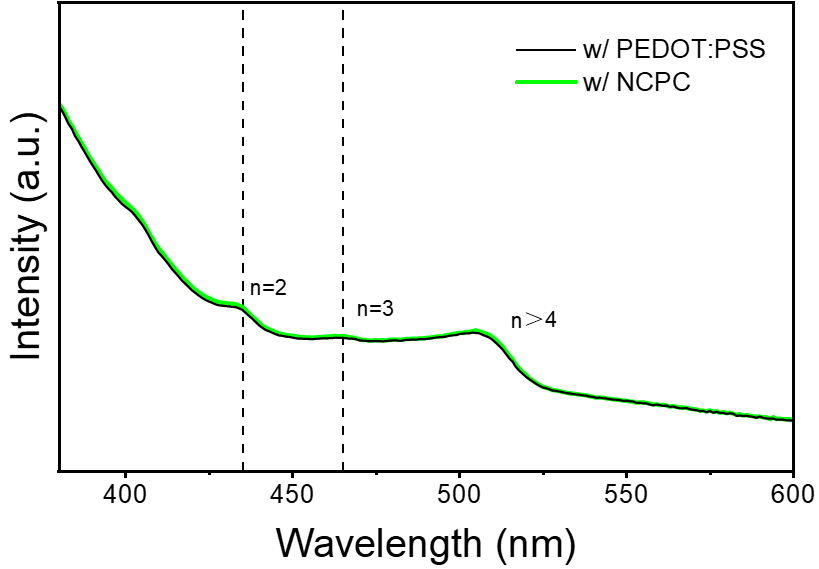
**

**Supplementary Figure. 9** UV–vis absorption spectra of green perovskite film on NCPC/PVK and PEDOT:PSS/PVK.

**
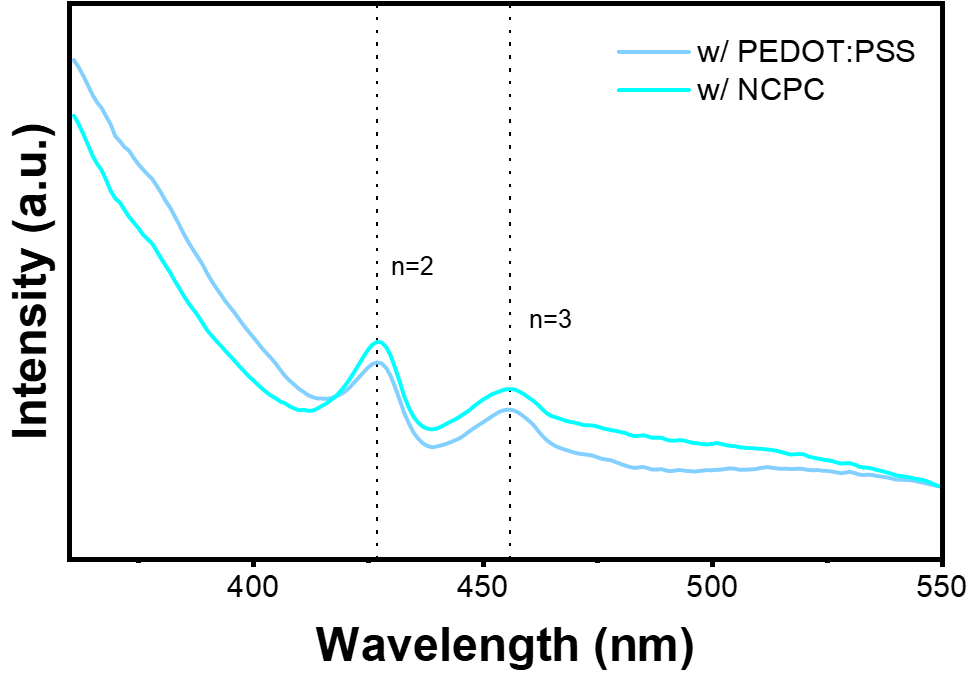
**

**Supplementary Figure. 10** UV–vis absorption spectra of blue perovskite film on NCPC/PVK and PEDOT:PSS/PVK.

**
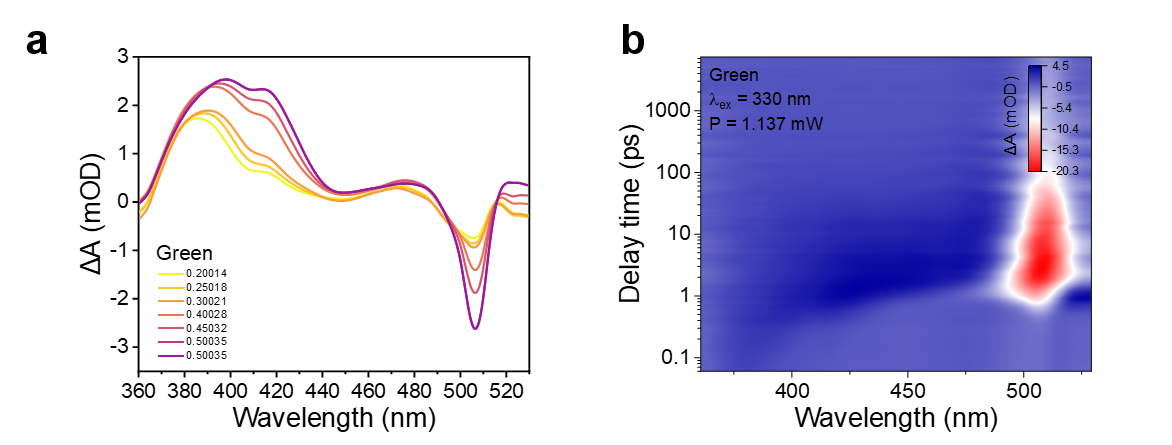
**

**Supplementary Figure. 11** TA measurements for green perovskite film following excitation at 330 nm. **(a)** TA spectra at selected probe delay times. **(b)** Pseudocolar TA spectra.

**
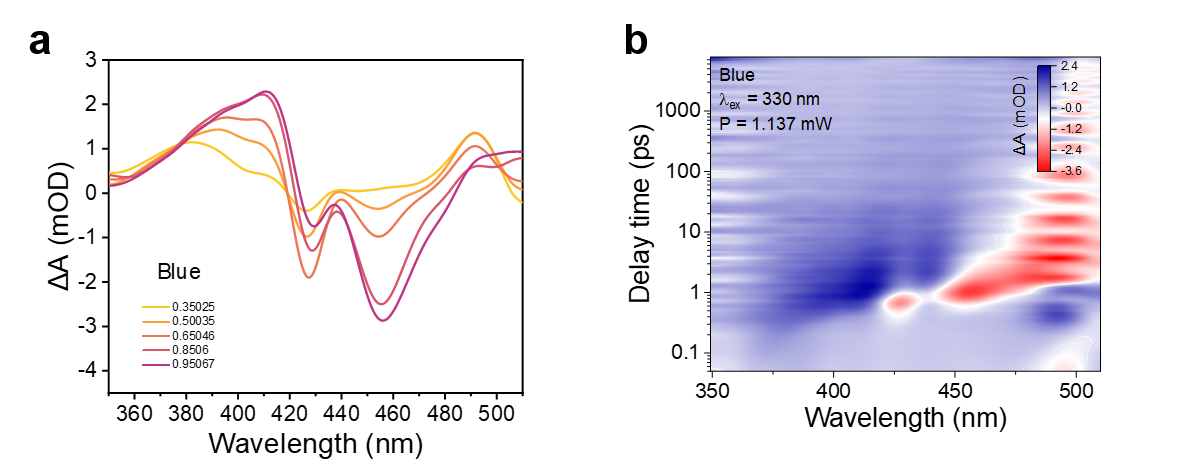
**

**Supplementary Figure. 12** TA measurements for blue perovskite film following excitation at 330 nm. **(a)** TA spectra at selected probe delay times. **(b)** Pseudocolar TA spectra.

**
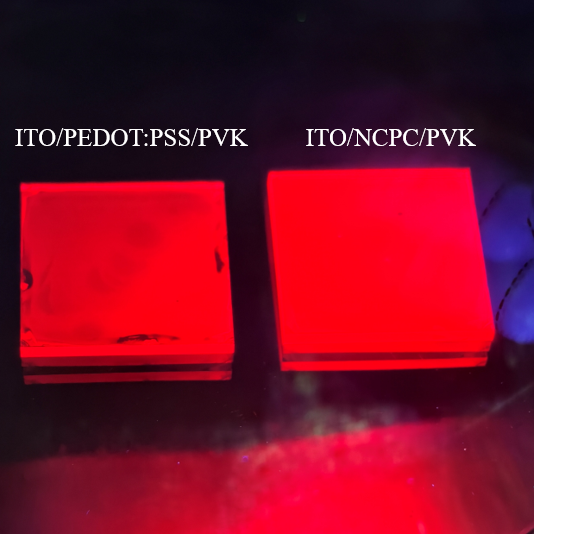
**

**Supplementary Figure. 13** Fluorescence images of red perovskite films on ITO/NCPC/PVK and ITO/PEDOT:PSS/PVK under 365 nm UV excitation.

**
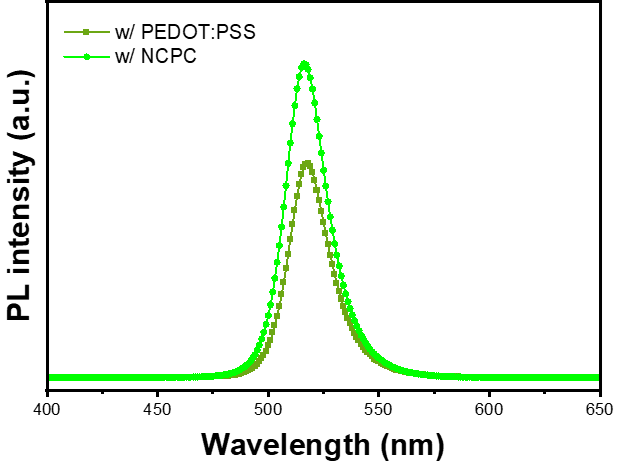
**

**Supplementary Figure. 14** The PL spectra of green perovskite films deposited on different HILs.

**
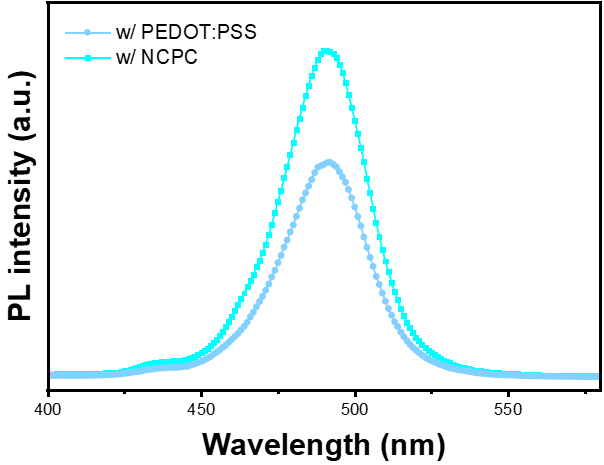
**

**Supplementary Figure. 15** The PL spectra of blue perovskite films deposited on different HILs.

**
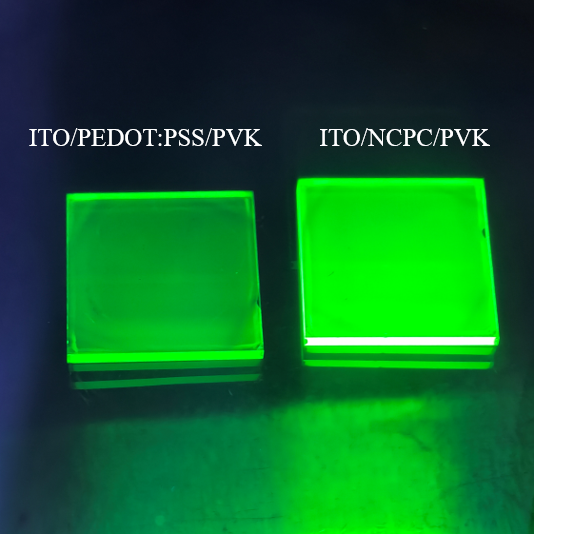
**

**Supplementary Figure. 16** Fluorescence images of green perovskite films on ITO/NCPC/PVK and ITO/PEDOT:PSS/PVK under 365 nm UV excitation.

**
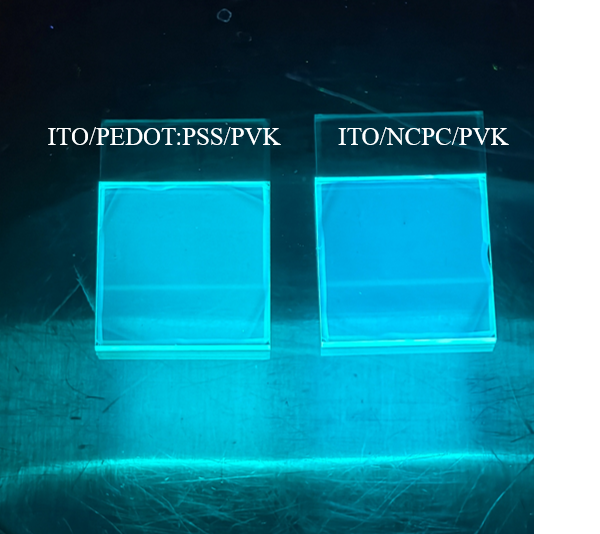
**

**Supplementary Figure. 17** Fluorescence images of blue perovskite films on ITO/NCPC/PVK and ITO/PEDOT:PSS/PVK under 365 nm UV excitation.

**
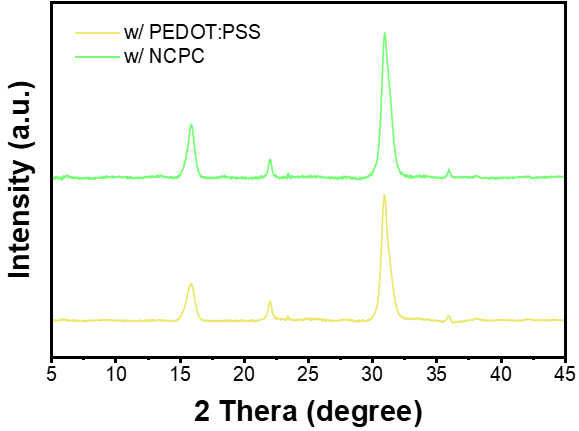
**

**Supplementary Figure. 18** XRD patterns of green perovskite films on PEDOT:PSS/PVK and NCPC/PVK.

**
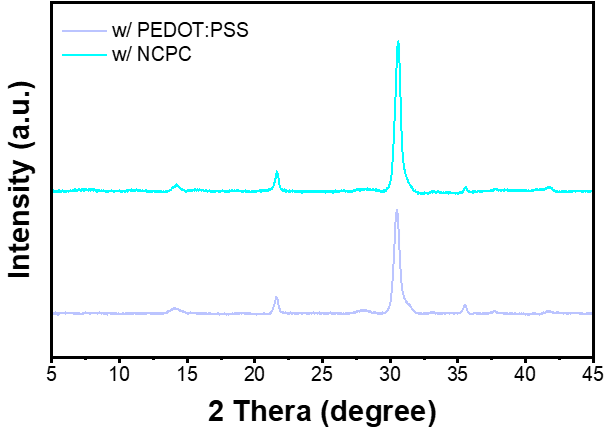
**

**Supplementary Figure. 19** XRD patterns of blue perovskite films on PEDOT:PSS/PVK and NCPC/PVK.

**
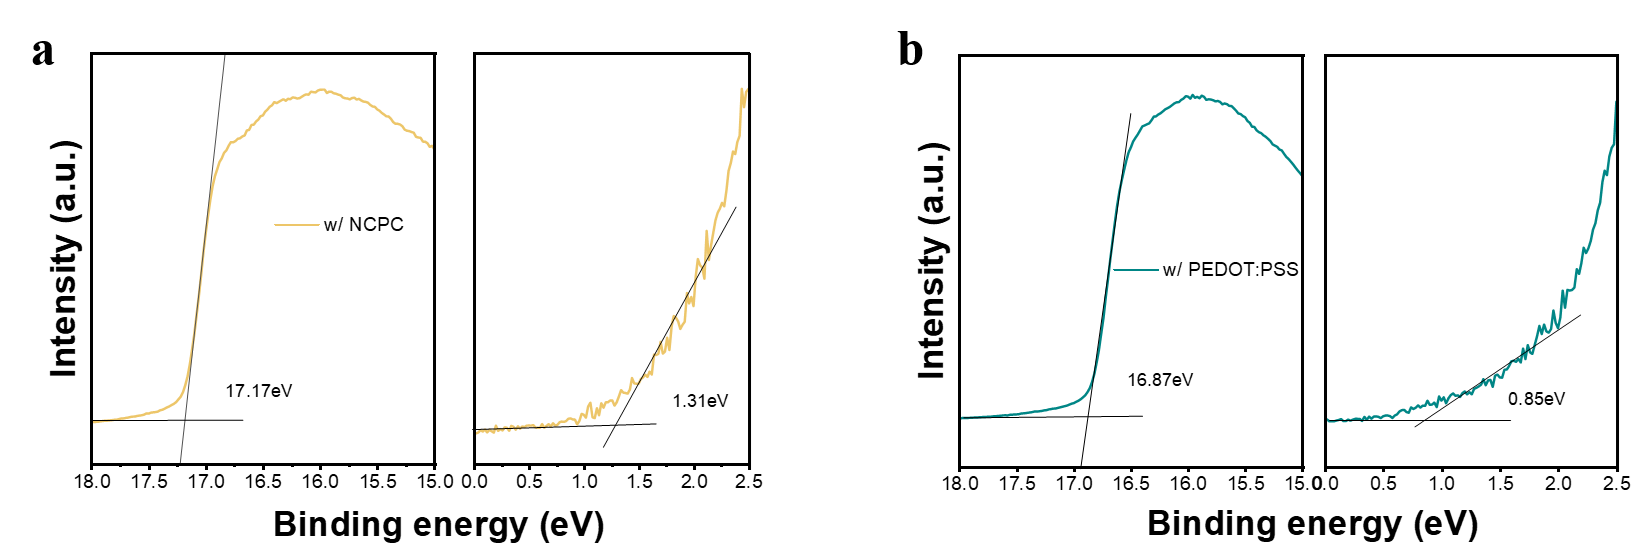
**

**Supplementary Figure. 20** Ultraviolet photoelectron spectroscopy (UPS) spectra of the ITO/NCPC **(a)** and ITO/PEDOT:PSS **(b)** film surfaces.

**
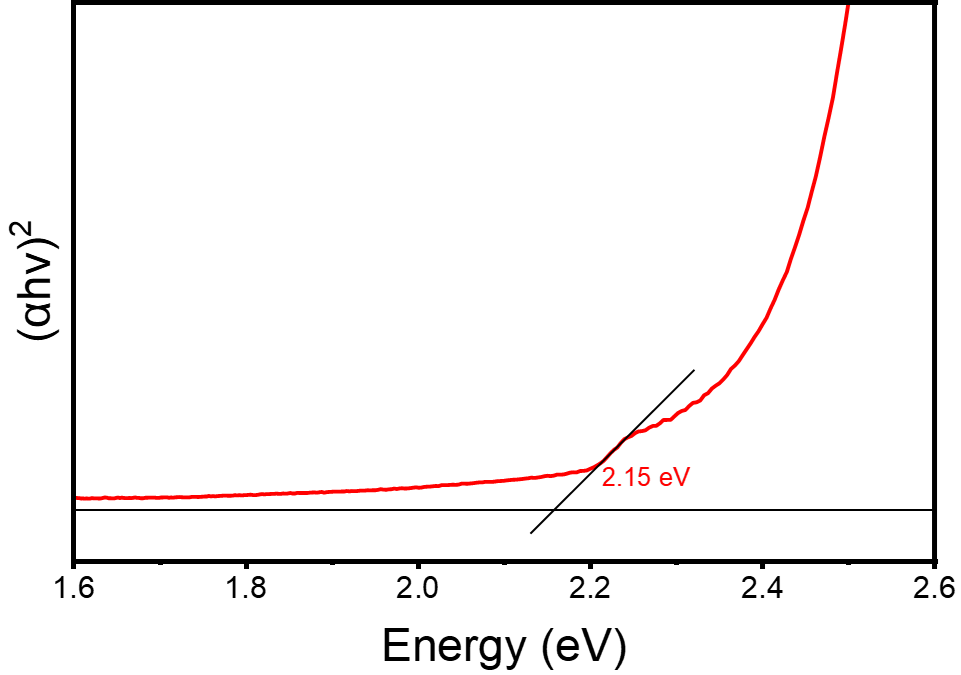
**

**Supplementary Figure. 21** Tauc plot analysis of NCPC film.

**
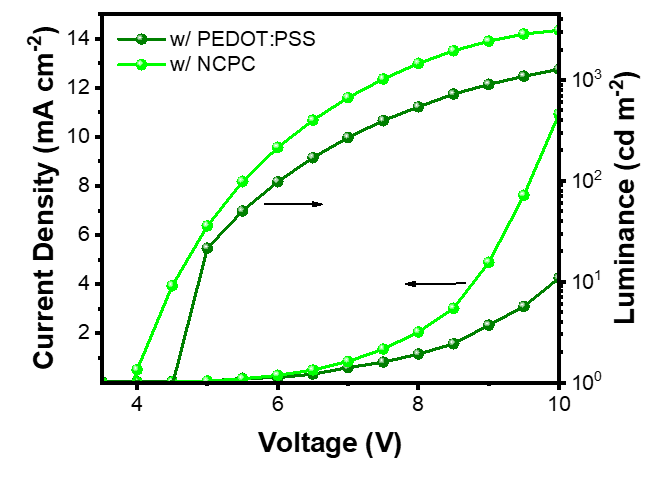
**

**Supplementary Figure. 22** Current density–voltage–luminance (*J*–V–L) curves of green PeLEDs with different HILs.

**
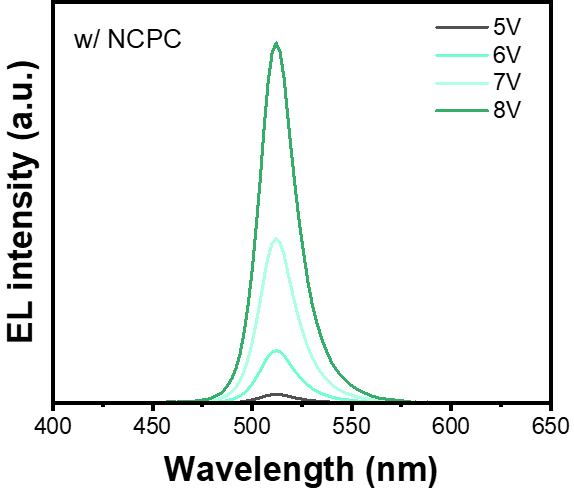
**

**Supplementary Figure. 23** EL spectra of NCPC-based green PeLEDs under various bias voltages.

**
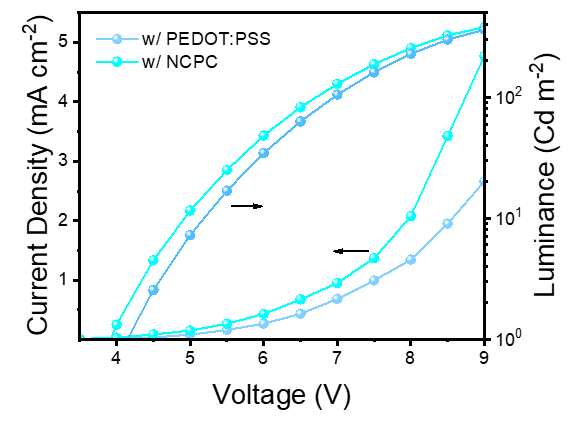
**

**Supplementary Figure. 24** Current density–voltage–luminance (*J*–V–L) curves of blue PeLEDs with different HILs.

**
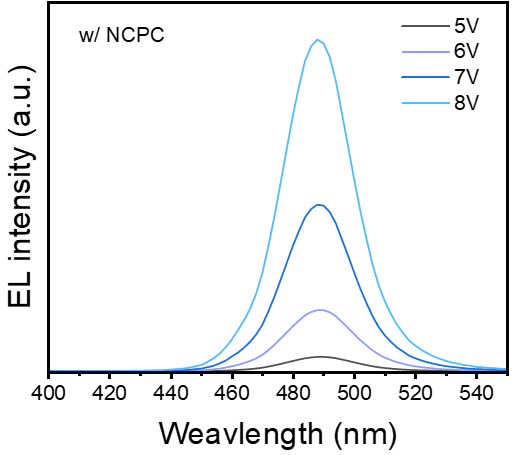
**

**Supplementary Figure. 25** EL spectra of NCPC-based blue PeLEDs under various bias voltages.


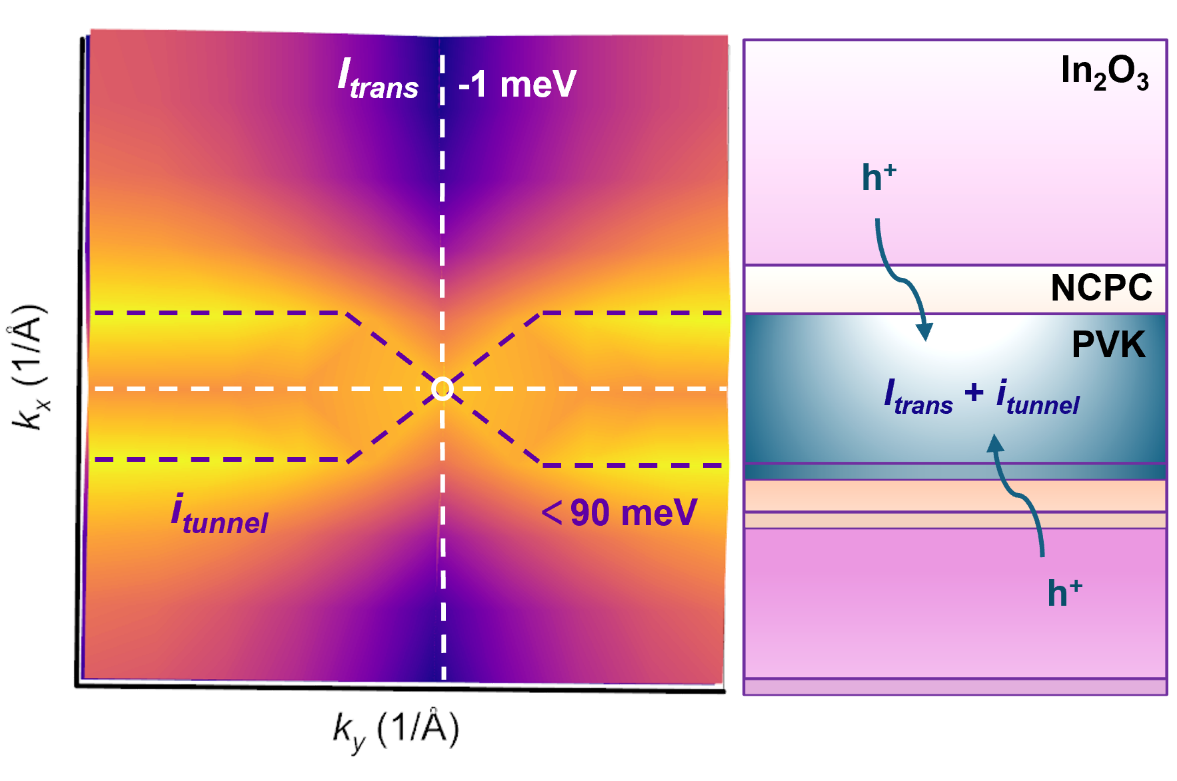


**Supplementary Figure. 26** Electronic band structure top view and conduction schematic of ITO/NCPC/PVK, showing direct hole transport (white) and tunneling (purple) regions.

**Table S1.** PL lifetime fitting parameters of the red perovskite films on different substrates.

| Sample | τ1 (ns) | A1 | τ2 (ns) | A2 | τAVE (ns) |
| --- | --- | --- | --- | --- | --- |
| w/ NCPC | 6.67 | 977.74 | 86.13 | 328.63 | 71.3 |
| w/ PEDOT:PSS | 5.86 | 978.37 | 72.14 | 399.06 | 61.0 |

**Table S2.** An overview of the performance characteristics for red PeLEDs from previous literature and our work.

| Emission layer | Emission peak [nm] | Maximum EQE [%] | Maximum Luminance  (cd m-2 ) | Ref. |
| --- | --- | --- | --- | --- |
| PEABr-CsPbI3 | 672 | 19.6 | 6078 | [1] |
| Phenylbutanammonium iodide (PBAI)-CsPbBr0.6I2.4-PEOXA | 670 | 9.1 | 1359 | [2] |
| CsPbI3 | 675 | 6.4 | 204 | [3] |
| FAxCs1−xPbIyBr3−y | 670 | 9.0 | 1524 | [4] |
| PEIE-MAxCs1−xPb(I1−yBry)3 | 670 | 16.0 | ~180 | [5] |
| CsPb(I0.8Br0.2)-PEOXA | 668 | 6.55 | 338 | [6] |
| PEA2Csn−1Pbn(Br/I)3n+1 | 668 | 30.08 | 140 | [7] |
| EDABr2/CsPbI3−xBrx | 671 | 17.03 | 10745 | [8] |
| **PEABr-CsPbI3** | **670** | **25.35** | **222** | **This work** |

**Supplementary References**

1. Zhang, D. L. et al. Highly Efficient Red Perovskite Light-Emitting Diodes with Reduced Efficiency Roll-Off Enabled by Manipulating Crystallization of Quasi-2D Perovskites. *Adv. Funct. Mater*. **32**, 2205707 (2022).
2. Liu, P. et al. Quasi-2D CsPbBrxI3−x Composite Thin Films for Efficient and Stable Red Perovskite Light-Emitting Diodes. *Adv. Optical Mater*. **9**, 2101419 (2021).
3. Yoo, J. H. et al. Park Room-temperature large-scale synthesis of black-phase CsPbI3 nanocrystals for red light-emitting diodes. *ACS Appl. Nano Mater*. **7**, 28119-28130 (2024).
4. Li, Y. et al. Sequential layer-by-layer deposition for high-performance fully thermal-evaporated red perovskite light-emitting diodes. *Nature Communications*. **16**, 6908 (2025).
5. Shao, Y. et al. Red Efficient Perovskite Light-Emitting Diodes Assisted with PEIE. *ACS Appl. Electron. Mater.* **6**, 6140 (2024).
6. Cai, W. et al. Polymer-Assisted In Situ Growth of All-Inorganic Perovskite Nanocrystal Film for Efficient and Stable Pure-Red Light-Emitting Devices. *ACS Appl. Mater. Interfaces****.* 10**, 42564-42572 (2018).
7. Feng, S. C. et al. Efficient and Stable Red Perovskite Light-Emitting Diodes via Thermodynamic Crystallization Control. *Adv. Mater.* **36,** 2410255(2024).
8. Li, N. et al. Diammonium-Mediated Perovskite Film Formation for High-Luminescence Red Perovskite Light-Emitting Diodes. *Adv. Mater.* **34**, 2202042 (2022).
